# Supplementary material
Source: PubMed Central journal article supplement (PMC6328775)
Supplement: AEM.01765-18-s0001.pdf [file AEM.01765-18-s0001.pdf]

## Supplemental Tables

**TABLE S1** Description of tomato hybrid rootstocks and their potential resistance to tomato diseases and pests, as described at [www.vegetablegrafting.org](http://www.vegetablegrafting.org).

| <b>Diseases</b>             | <b>Maxifort</b> | <b>RST-04-106</b> |
|-----------------------------|-----------------|-------------------|
| Bacterial Wilt              |                 | R                 |
| Corky Root Rot              | R               | R                 |
| Fusarium Wilt Race 1        | R               | R                 |
| Fusarium Wilt Race 2        | R               | R                 |
| Fusarium Crown and Root Rot | R               |                   |
| Verticillium Wilt           | R               |                   |
| Nematode                    | R               | R                 |
| Tomato Mosaic Virus         | R               | R                 |
| Developer                   | DeRuiter Seeds  | DP Seeds          |

R: Resistant

**TABLE S2** ANOVA table comparing Shannon entropy among the rootstock treatments.

Observations were divided by compartments (A & C – Endosphere; B & D – Rhizosphere) and years (A & B – Year 2015; C & D – Year 2015), and diversity was compared among the rootstock treatments at each study site.

**A) Year = 2014**

**Compartment = Endosphere**

**Analysis of Variance Table**

Response: value

|                      | Df | Sum Sq | Mean Sq | F value | Pr(>F) |    |
|----------------------|----|--------|---------|---------|--------|----|
| Rootstock            | 3  | 2224.7 | 741.55  | 5.95    | 0.001  | ** |
| Study_site           | 2  | 989.1  | 494.54  | 3.97    | 0.025  | *  |
| Rootstock:Study_site | 6  | 1200.1 | 200.02  | 1.60    | 0.167  |    |
| Residuals            | 44 | 5474.9 | 124.43  |         |        |    |

Study\_site = Common Harvest:

| Rootstock  | lsmean | SE   | df | lower.CL | upper.CL | .group |
|------------|--------|------|----|----------|----------|--------|
| Maxifort   | 56.70  | 5.57 | 44 | 45.46    | 67.94    | a      |
| Nongraft   | 54.20  | 5.57 | 44 | 42.96    | 65.44    | a      |
| RST-04-106 | 54.14  | 5.57 | 44 | 42.90    | 65.38    | a      |
| Selfgraft  | 41.84  | 5.57 | 44 | 30.60    | 53.08    | a      |

Study\_site = Gieringer:

| Rootstock  | lsmean | SE   | df | lower.CL | upper.CL | .group |
|------------|--------|------|----|----------|----------|--------|
| Maxifort   | 70.85  | 5.57 | 44 | 59.61    | 82.09    | a      |
| Selfgraft  | 64.92  | 5.57 | 44 | 53.68    | 76.17    | ab     |
| Nongraft   | 55.13  | 5.57 | 44 | 43.89    | 66.37    | ab     |
| RST-04-106 | 50.19  | 5.57 | 44 | 38.95    | 61.43    | b      |

Study\_site = OHREC:

| Rootstock  | lsmean | SE   | df | lower.CL | upper.CL | .group |
|------------|--------|------|----|----------|----------|--------|
| Maxifort   | 65.56  | 4.55 | 44 | 56.38    | 74.74    | a      |
| Selfgraft  | 47.53  | 4.55 | 44 | 38.36    | 56.71    | b      |
| RST-04-106 | 45.35  | 4.55 | 44 | 36.17    | 54.53    | b      |
| Nongraft   | 43.83  | 4.55 | 44 | 34.65    | 53.01    | b      |

**B) TABLE S2 Continued.**  
**Year = 2014**  
**Compartment = Rhizosphere**  
**Analysis of Variance Table**

Response: value

|                      | Df | Sum Sq | Mean Sq | F value | Pr(>F)     |
|----------------------|----|--------|---------|---------|------------|
| Rootstock            | 3  | 31945  | 10648.5 | 5.42    | 0.002 **   |
| Study_site           | 2  | 34621  | 17310.7 | 8.81    | 0.0006 *** |
| Rootstock:Study_site | 6  | 4982   | 830.4   | 0.42    | 0.8598     |
| Residuals            | 44 | 86408  | 1963.8  |         |            |

Study\_site = Common Harvest:

| Rootstock  | lsmean | SE    | df | lower.CL | upper.CL | .group |
|------------|--------|-------|----|----------|----------|--------|
| Maxifort   | 162.97 | 22.15 | 44 | 118.32   | 207.63   | a      |
| RST-04-106 | 123.41 | 22.15 | 44 | 78.75    | 168.06   | ab     |
| Nongraft   | 112.03 | 22.15 | 44 | 67.37    | 156.68   | ab     |
| Selfgraft  | 98.14  | 22.15 | 44 | 53.48    | 142.79   | b      |

Study\_site = Gieringer:

| Rootstock  | lsmean | SE    | df | lower.CL | upper.CL | .group |
|------------|--------|-------|----|----------|----------|--------|
| Maxifort   | 132.74 | 22.15 | 44 | 88.08    | 177.40   | a      |
| RST-04-106 | 101.02 | 22.15 | 44 | 56.36    | 145.67   | a      |
| Selfgraft  | 86.48  | 22.15 | 44 | 41.83    | 131.14   | a      |
| Nongraft   | 77.88  | 22.15 | 44 | 33.23    | 122.54   | a      |

Study\_site = OHREC:

| Rootstock  | lsmean | SE    | df | lower.CL | upper.CL | .group |
|------------|--------|-------|----|----------|----------|--------|
| Maxifort   | 201.66 | 18.09 | 44 | 165.20   | 238.12   | a      |
| Selfgraft  | 164.58 | 18.09 | 44 | 128.11   | 201.04   | ab     |
| RST-04-106 | 146.23 | 18.09 | 44 | 109.77   | 182.69   | b      |
| Nongraft   | 121.25 | 18.09 | 44 | 84.79    | 157.72   | b      |

**C) TABLE S2 Continued.**  
**Year = 2015**  
**Compartment = Endosphere**  
**Analysis of Variance Table**

Response: value

|                      | Df | Sum Sq  | Mean Sq | F value | Pr(>F)        |
|----------------------|----|---------|---------|---------|---------------|
| Rootstock            | 3  | 2207.5  | 735.82  | 3.0160  | 0.039 *       |
| Study_site           | 2  | 5805.6  | 2902.81 | 11.8983 | 7.403e-05 *** |
| Rootstock:Study_site | 6  | 1533.6  | 255.60  | 1.0477  | 0.408         |
| Residuals            | 44 | 10734.6 | 243.97  |         |               |

Study\_site = Common Harvest:

| Rootstock  | lsmean | SE   | df | lower.CL | upper.CL | .group |
|------------|--------|------|----|----------|----------|--------|
| Maxifort   | 88.16  | 7.80 | 44 | 72.42    | 103.90   | a      |
| Selfgraft  | 82.76  | 7.80 | 44 | 67.02    | 98.50    | a      |
| RST-04-106 | 82.09  | 7.80 | 44 | 66.35    | 97.83    | a      |
| Nongraft   | 67.88  | 7.80 | 44 | 52.14    | 83.62    | a      |

Study\_site = Gieringer:

| Rootstock  | lsmean | SE   | df | lower.CL | upper.CL | .group |
|------------|--------|------|----|----------|----------|--------|
| Nongraft   | 58.84  | 7.80 | 44 | 43.10    | 74.58    | a      |
| Maxifort   | 56.03  | 7.80 | 44 | 40.29    | 71.77    | a      |
| RST-04-106 | 53.81  | 7.80 | 44 | 38.07    | 69.55    | a      |
| Selfgraft  | 51.94  | 7.80 | 44 | 36.20    | 67.68    | a      |

Study\_site = OHREC:

| Rootstock  | lsmean | SE   | df | lower.CL | upper.CL | .group |
|------------|--------|------|----|----------|----------|--------|
| Maxifort   | 90.59  | 6.37 | 44 | 77.73    | 103.44   | a      |
| RST-04-106 | 79.19  | 6.37 | 44 | 66.34    | 92.04    | ab     |
| Selfgraft  | 68.46  | 6.37 | 44 | 55.61    | 81.31    | b      |
| Nongraft   | 62.64  | 6.37 | 44 | 49.79    | 75.50    | b      |

**D) TABLE S2 Continued.**  
**Year = 2015**  
**Compartment = Rhizosphere**  
**Analysis of Variance Table**

Response: value

|                      | Df | Sum Sq | Mean Sq | F value | Pr(>F) |
|----------------------|----|--------|---------|---------|--------|
| Rootstock            | 3  | 13594  | 4531.3  | 2.4316  | 0.07 . |
| Study_site           | 2  | 2490   | 1244.9  | 0.6680  | 0.51   |
| Rootstock:Study_site | 6  | 5265   | 877.6   | 0.4709  | 0.82   |
| Residuals            | 44 | 81995  | 1863.5  |         |        |

---

Signif. codes: 0 '\*\*\*' 0.001 '\*\*' 0.01 '\*' 0.05 '.' 0.1 ' ' 1

Study\_site = Common Harvest:

| Rootstock  | lsmean | SE    | df | lower.CL | upper.CL | .group |
|------------|--------|-------|----|----------|----------|--------|
| RST-04-106 | 161.07 | 21.58 | 44 | 117.57   | 204.57   | a      |
| Selfgraft  | 136.89 | 21.58 | 44 | 93.39    | 180.39   | a      |
| Maxifort   | 134.76 | 21.58 | 44 | 91.26    | 178.26   | a      |
| Nongraft   | 126.29 | 21.58 | 44 | 82.79    | 169.79   | a      |

Study\_site = Gieringer:

| Rootstock  | lsmean | SE    | df | lower.CL | upper.CL | .group |
|------------|--------|-------|----|----------|----------|--------|
| Maxifort   | 178.03 | 21.58 | 44 | 134.53   | 221.53   | a      |
| RST-04-106 | 149.58 | 21.58 | 44 | 106.08   | 193.09   | a      |
| Nongraft   | 135.36 | 21.58 | 44 | 91.86    | 178.86   | a      |
| Selfgraft  | 127.74 | 21.58 | 44 | 84.24    | 171.24   | a      |

Study\_site = OHREC:

| Rootstock  | lsmean | SE    | df | lower.CL | upper.CL | .group |
|------------|--------|-------|----|----------|----------|--------|
| Maxifort   | 185.09 | 17.62 | 44 | 149.58   | 220.61   | a      |
| RST-04-106 | 165.06 | 17.62 | 44 | 129.55   | 200.58   | ab     |
| Nongraft   | 139.58 | 17.62 | 44 | 104.06   | 175.10   | ab     |
| Selfgraft  | 133.27 | 17.62 | 44 | 97.75    | 168.79   | b      |

A) 2014\_Endosphere



**FIG S1** Profile of bacterial communities from tomato rootstocks at the phylum level, separated by compartment, location, and sampling year. The relative abundance of the endosphere (A & C) and rhizosphere (B & D) bacterial phyla associated with two hybrid rootstocks (RST-04-106 and Maxifort) and nongraft and selfgraft (BHN589) controls are reported for the years 2014 and 2015. The colored area of each bar represents the relative abundance of the corresponding phylum.

B) 2014\_Rhizosphere



FIG S1 Continued.

C) 2015\_Endosphere



FIG S1 Continued.



D) 2015\_Rhizosphere



FIG S1 Continued.

## **Information about Supplemental Datasets**

**Dataset S1:** Table displaying the bioinformatics pipeline used for analyzing sequence data using mothur.

**Dataset S2:** Table showing the endosphere and rhizosphere samples associated with four rootstocks across three study sites in the year 2014.

**Dataset S3:** Table showing the endosphere and rhizosphere samples associated with four rootstocks across three study sites in the year 2015.

**Dataset S4:** Ten most frequent OTUs observed for each rootstock treatment in the endosphere and the rhizosphere compartment.
